1 **Title:** Incidence of Severe Acute Respiratory Syndrome Coronavirus-2 infection among  
2 previously infected or vaccinated employees

3

4 **Authors:** Kojima N<sup>1</sup>; Roshani A<sup>2</sup>; Brobeck M<sup>2</sup>; Baca A<sup>2</sup>; and Klausner JD<sup>3</sup>

5

6 <sup>1</sup> Department of Medicine, University of California Los Angeles, Los Angeles, 90095

7 <sup>2</sup> Curative Inc., San Dimas, CA

8 <sup>3</sup> Department of Population and Public Health Sciences, University of Southern  
9 California, Keck School of Medicine, Los Angeles, 90033

10

11 **Keywords:** COVID-19; SARS-CoV-2; Incidence; Reinfection; Prior Infection;

12 Vaccination

13

14 **Abstract (Words 350)**

15 **Introduction:** The protective effect of previous infection versus vaccination is poorly  
16 studied. Among a clinical laboratory that has been conducting routine workforce  
17 screening since the beginning of the pandemic, we aimed to assess the relative risk of  
18 Severe Acute Respiratory Syndrome Coronavirus-2 (SARS-CoV-2) infection among  
19 individuals who were SARS-CoV-2 naïve, previously infected, or vaccinated.

20 **Methods:** Using an electronic laboratory information system, employees were divided  
21 into three groups: (1) SARS-CoV-2 naïve and unvaccinated, (2) previous SARS-CoV-2  
22 infection, and (3) vaccinated. Person-days were measured from the date of the  
23 employee first test and truncated at the end of the observation period. SARS-CoV-2  
24 infection was defined as two positive SARS-CoV-2 PCR tests in a 30-day period.  
25 Individuals with fewer than 14 days of follow up were excluded. Incidence estimates and  
26 the 95% confidence intervals were calculated using the Poisson Exact equation. The  
27 incidence rate ratio (IRR) was used as a measure of association between groups.  
28 Analyses were performed on StataSE (StataCorp, College Station, TX).

29 **Results:** We identified 4313, 254 and 739 employee records for groups 1, 2, and 3,  
30 respectively. The median age of employees was 29.0 years (interquartile range: 23.6,  
31 39.9). During the observation period, 254, 0, and 4 infections were identified among  
32 groups 1, 2, and 3, respectively. Group 1 had an incidence of 25.9 per 100 person-  
33 years (95% CI: 22.8-29.3). Group 2 had an incidence of 0 per 100 person-years (95%  
34 CI: 0-5.0). Group 3 had an incidence of 1.6 per 100 person-years (95% CI: 0.04-4.2).  
35 The IRR of reinfection among those with previous infection compared to SARS-CoV-2  
36 naïve was 0 (95% CI: 0-0.19). The IRR of those vaccinated compared to SARS-CoV-2

37 naïve was 0.06 (95% CI: 0.02-0.16). The IRR of those vaccinated compared to prior  
38 SARS-CoV-2 was 0 (95% CI: 0-4.98).

39 **Conclusion:** Previous SARS-CoV-2 infection and vaccination for SARS-CoV-2 were  
40 associated with decreased risk for infection or re-infection with SARS-CoV-2 in a  
41 routinely screened workforce. There was no difference in the infection incidence between  
42 vaccinated individuals and individuals with previous infection. Further research is  
43 needed to determine whether our results are consistent with the emergence of new  
44 SARS-CoV-2 variants.

45

46 **Main Text (930 words)**

47 **Introduction**

48 Prior reports have found lower rates of Severe Acute Respiratory Syndrome  
49 Coronavirus-2 (SARS-CoV-2) infections among those with prior infection or  
50 vaccination.<sup>1, 2</sup> Although an association between vaccination and reduction of SARS-  
51 CoV-2 incidence has been well described, how the incidence among individuals with  
52 previous infection compares to vaccinated individuals remains unclear.

53

54 **Methods**

55 In March 2020, Curative, a SARS-CoV-2 testing company, began routinely screening its  
56 workforce with an Food and Drug Administration-authorized SARS-CoV-2 polymerase  
57 chain reaction (PCR)-based test.<sup>3</sup> The workforce was screened daily. A standardized  
58 employee testing database was implemented on 8 May 2020. On December 15, 2020,  
59 vaccination with either the BNT162b2 or mRNA-1273 vaccines became available.  
60 Routine screening has continued through July 2021.

61

62 The SARS-CoV-2 naïve, unvaccinated group was defined as any employee without  
63 previous infection that tested from 8 May up to 15 December 2020 (when vaccination  
64 became available). The previously infected, unvaccinated group was defined as any  
65 employee with documented previous SARS-CoV-2 infection (at least 2 positive PCR  
66 tests) between 8 May to 15 December 2020. The vaccinated group was defined as any  
67 employee with documented completion of vaccination through 1 July 2021.

68

69 Person-days were measured from the first test date to last test date up to December  
70 15<sup>th</sup>, 2020 for groups 1 and 2 and up to July 1, 2021 for group 3. We defined SARS-  
71 CoV-2 infection as two positive PCR tests in a 30-day period. Individuals with fewer  
72 than 14 days of follow up were excluded. Incidence in 100 person-years with 95%  
73 confidence intervals (95% CIs) was calculated with the Poisson Exact equation. The  
74 incidence rate ratio (IRR), the ratio of confirmed COVID-19 cases per 100 person-years  
75 of follow up with 95% CIs, was used as a measure of association between groups.  
76 Analyses were performed on StataSE (StataCorp, College Station, TX). The study of  
77 de-identified electronic medical record data was determined by the Advarra institutional  
78 review board (Pro00054560) to be exempt from review.

79

## 80 **Results**

81 We identified 4313, 254 and 739 employee records for the naïve and unvaccinated  
82 group (Group 1), the previously infected and unvaccinated group (Group 2) and the  
83 vaccinated without previous infection group (Group 3), respectively. The median age of  
84 employees was 29.0 years (interquartile range: 23.6, 39.9). During the observation  
85 period, 254, 0, and 4 SARS-CoV-2 incident infections were identified among Groups 1,  
86 2, and 3, respectively. (Table).

87

88 The naïve, unvaccinated group had a SARS-CoV-2 incidence of 25.9 per 100 person-  
89 years (95% CI: 22.8-29.3). The previously infected, unvaccinated group had an  
90 incidence of 0 per 100 person-years (95% CI: 0-5.0). The vaccinated group had an  
91 incidence of 1.6 per 100 person-years (95% CI: 0.04-4.2). The IRR of reinfection among

92 those with previous infection compared to those SARS-CoV-2 naïve was 0 (95% CI: 0-  
93 0.19). The IRR of those vaccinated compared to those SARS-CoV-2 naïve was 0.06  
94 (95% CI: 0.02-0.16). The IRR of those vaccinated compared to those previously SARS-  
95 CoV-2 infected was 0 (95% CI: 0-4.98).

96

## 97 **Discussion**

98 In the workplace setting, we observed a lower incidence of SARS-CoV-2 infection  
99 among those with previous SARS-CoV-2 infection or SARS-CoV-2 vaccination with  
100 either the BNT162b2 or mRNA-1273 vaccines. Either prior infection or vaccination was  
101 associated with a dramatic decreased risk for infection or re-infection with SARS-CoV-2.  
102 There was no difference in the incidence of SARS-CoV-2 infection or re-infection between  
103 individuals who were vaccinated and individuals with prior SARS-CoV-2 infection,  
104 respectively.

105

106 Our findings are similar to other studies that compared the incidence of SARS-CoV-2  
107 infection among those with prior SARS-CoV-2 infection and vaccination to unvaccinated  
108 antibody seronegative individuals. In a study conducted in Oxfordshire, UK, researchers  
109 reported that they found no differences in immunity induced by natural infection and  
110 vaccination with the BNT162b2 or ChAdOx1 nCoV-19 vaccines among a cohort of  
111 13,109 healthcare workers.<sup>4</sup> Another group of researchers studying a group of 52,238  
112 employees of the Cleveland Clinic Health System found that those with previous SARS-  
113 CoV-2 infection and those who were vaccinated had lower rates of SARS-CoV-2  
114 infection compared to those who were SARS-CoV-2 naïve and unvaccinated.<sup>5</sup>

115  
116 After vaccination or natural infection, many mechanisms of immunity exist including  
117 humoral and cellular immunity.<sup>6-8</sup> It is known that SARS-CoV-2 infection induces specific  
118 and durable T cell immunity against multiple SARS-CoV-2 spike (S) protein targets (or  
119 epitopes) as well recognition of other SARS-CoV-2 proteins. The broad diversity of T-  
120 cell viral recognition serves to enhance protection to SARS-CoV-2 variants,<sup>7</sup> with  
121 recognition of at least three SARS-CoV-2 variants (B.1.1.7 [U.K.], B.1.351 [South Africa],  
122 and B.1.1.248 [Brazil]).<sup>9</sup> Additionally, a memory B cell response to SARS-CoV-2 evolves  
123 between 1.3 and 6.2 months after infection that is consistent with immune persistence.<sup>10</sup>

124  
125 Our findings were limited by the observational nature of the study. It is possible, but  
126 unlikely, that employees could have tested positive outside of the employee testing  
127 program. In addition, because allocation to each exposure group was not random, there  
128 might be differences between groups in the risk of repeat exposure over time. The study  
129 was strengthened by the high incidence among those naïve and unvaccinated, the large  
130 sample size and large number of person-years of follow up in each group.

131  
132 **Conclusion**

133 We found a strong association between prior SARS-CoV-2 infection and vaccination for  
134 SARS-CoV-2 with either BNT162b2 or mRNA-1273 and the reduced incidence of  
135 SARS-CoV-2 when compared to those naïve and unvaccinated to SARS-CoV-2. The  
136 was no difference in the incidence of SARS-CoV-2 between individuals who were  
137 vaccinated and individuals with prior SARS-CoV-2 infection. Combined with prior

138 studies, our findings should provide increased confidence that those previously infected  
139 are at very low risk for repeat infection. Further research is needed to determine  
140 whether our results are consistent with the emergence of new SARS-CoV-2 variants.

141

## 142 **Declarations**

143 Declaration of competing interests

144 NK is a consultant for Curative. AR, MB, and AB are employed by Curative. JDK is an  
145 independent consultant and serves as the Medical Director of Curative.

146

## 147 **Funding**

148 None

149

## 150 **Acknowledgements**

151 The staff at Curative Inc.



152 **References**

- 153 1. Qureshi AI, Baskett WI, Huang W, et al. Re-infection with SARS-CoV-2 in  
154 Patients Undergoing Serial Laboratory Testing. *Clin Infect Dis*. Apr 25  
155 2021;doi:10.1093/cid/ciab345
- 156 2. Dagan N, Barda N, Kepten E, et al. BNT162b2 mRNA Covid-19 Vaccine in a  
157 Nationwide Mass Vaccination Setting. *N Engl J Med*. Apr 15 2021;384(15):1412-1423.  
158 doi:10.1056/NEJMoa2101765
- 159 3. Kojima N, Turner F, Slepnev V, et al. Self-Collected Oral Fluid and Nasal Swab  
160 Specimens Demonstrate Comparable Sensitivity to Clinician-Collected Nasopharyngeal  
161 Swab Specimens for the Detection of SARS-CoV-2. *Clin Infect Dis*. Oct 19  
162 2020;doi:10.1093/cid/ciaa1589
- 163 4. Lumley SF, Rodger G, Constantinides B, et al. An observational cohort study on  
164 the incidence of SARS-CoV-2 infection and B.1.1.7 variant infection in healthcare  
165 workers by antibody and vaccination status. *Clin Infect Dis*. 2021;  
166 doi:10.1093/cid/ciab608
- 167 5. Shrestha NK, Burke PC, Nowacki AS, et al. Necessity of COVID-19 vaccination  
168 in previously infected individuals. *medRxiv*. 2021; doi:10.1101/2021.06.01.21258176
- 169 6. Doshi P. Covid-19: Do many people have pre-existing immunity? *Bmj*. Sep 17  
170 2020;370:m3563. doi:10.1136/bmj.m3563
- 171 7. Le Bert N, Tan AT, Kunasegaran K, et al. SARS-CoV-2-specific T cell immunity  
172 in cases of COVID-19 and SARS, and uninfected controls. *Nature*. Aug  
173 2020;584(7821):457-462. doi:10.1038/s41586-020-2550-z

- 174 8. Shrotri M, van Schalkwyk MCI, Post N, et al. T cell response to SARS-CoV-2  
175 infection in humans: A systematic review. *PloS one*. 2021;16(1):e0245532.  
176 doi:10.1371/journal.pone.0245532
- 177 9. Redd AD, Nardin A, Kared H, et al. CD8+ T cell responses in COVID-19  
178 convalescent individuals target conserved epitopes from multiple prominent SARS-CoV-  
179 2 circulating variants. *medRxiv*. Feb 12 2021;doi:10.1101/2021.02.11.21251585
- 180 10. Gaebler C, Wang Z, Lorenzi JCC, et al. Evolution of antibody immunity to SARS-  
181 CoV-2. *Nature*. Mar 2021;591(7851):639-644. doi:10.1038/s41586-021-03207-w  
182

183 **Table.** Incidence of SARS-CoV-2 infection among employees SARS-CoV-2 naïve, previously infected or vaccinated in a  
 184 clinical laboratory workforce, 2020-2021

| <u>SARS-CoV-2 Status</u> | <u>Cohort size</u> | <u>Number of infections</u> | <u>Follow up time<br/>(person-years)</u> | <u>Incidence per 100 PY (95% CI)*</u> |
|--------------------------|--------------------|-----------------------------|------------------------------------------|---------------------------------------|
| Naive                    | 4313               | 254                         | 979.7                                    | 25.9 (22.8-29.3)                      |
| Previously Infected      | 254                | 0                           | 74.4                                     | 0 (0-5.0)                             |
| Fully Vaccinated         | 739                | 4                           | 244.5                                    | 1.6 (0.04-4.2)                        |

185 \* PY = person-years, 95% Confidence Interval by Poisson Exact test
